# Supplementary material for: Model of For3p-Mediated Actin Cable Assembly in Fission Yeast
Source: PubMed Central journal article supplement (PMC2605553; doi:10.1371/journal.pone.0004078), 2008-12-31

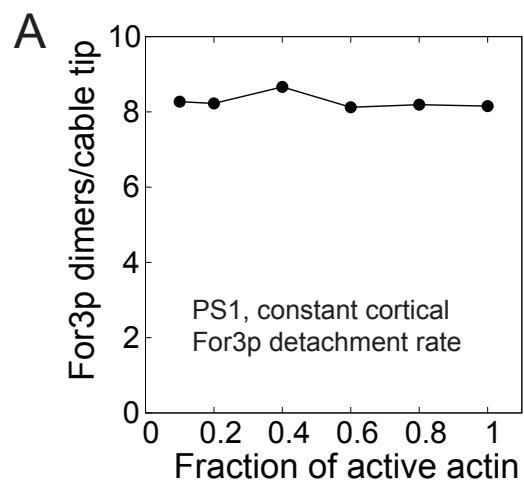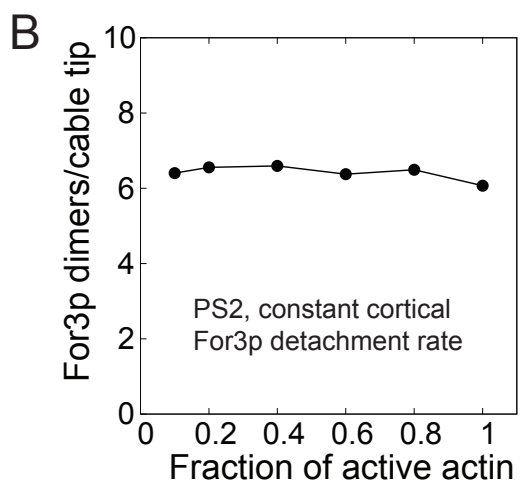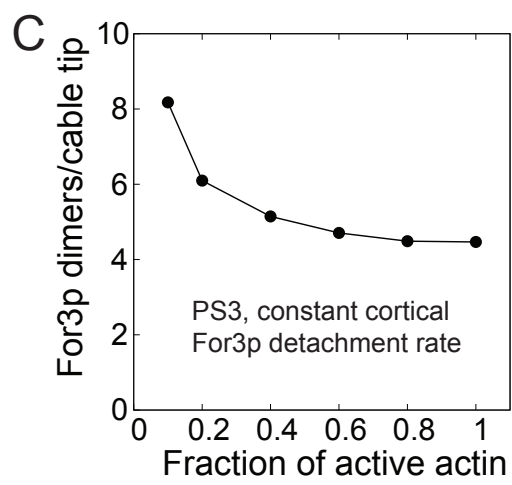

Supplement: pone.0004078.s008.pdf [file pone.0004078.s008.pdf]
